# Supplementary material
Source: Research Square preprint supplement (doi:10.21203/rs.3.rs-10153639/v1)
Supplement: Supplementary file 1 [file 0492c90f76e3e30d60d0be30.docx]

**Table 1.** Trapping effort, nest detected, and capture success of *Grammomys poensis* across the 12 forest fragments (S1-S12) surveyed around Lekoni (Batéké Plateau).
